# Supplementary material
Source: Springer Nature journal article supplement (https://www.springermedizin.de/resource/supplementary/13231_2010_20_MOESM3_ESM.pdf/9676346)

**A**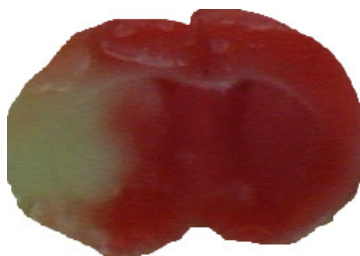**WT**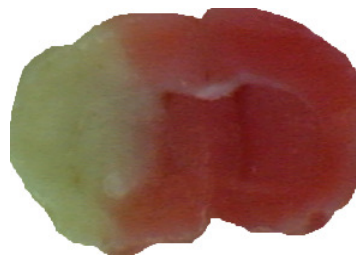**EP2<sup>-/-</sup>****B**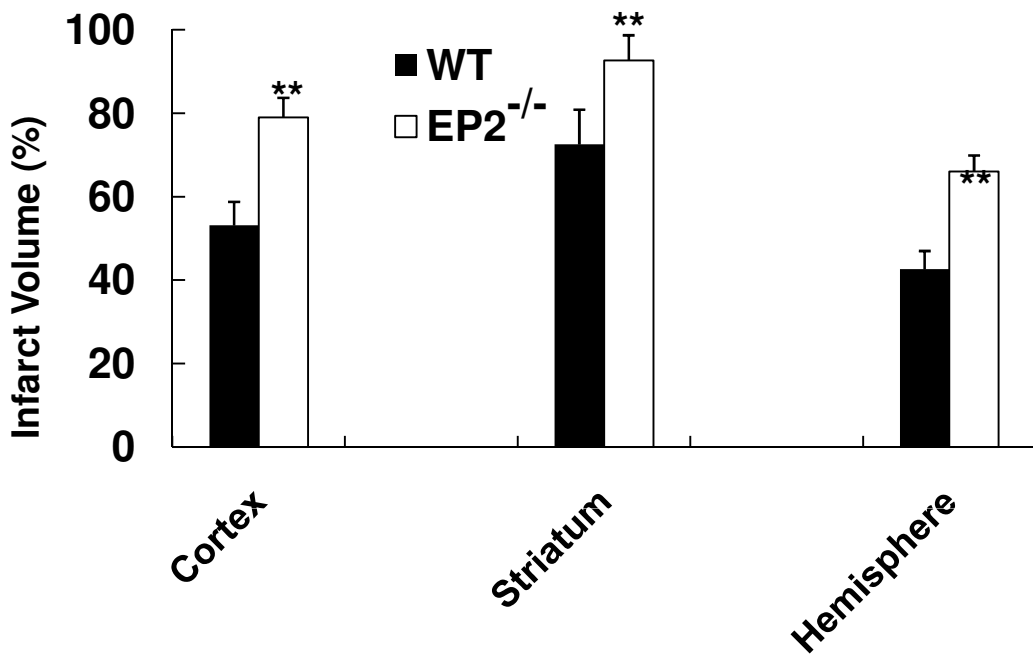**C**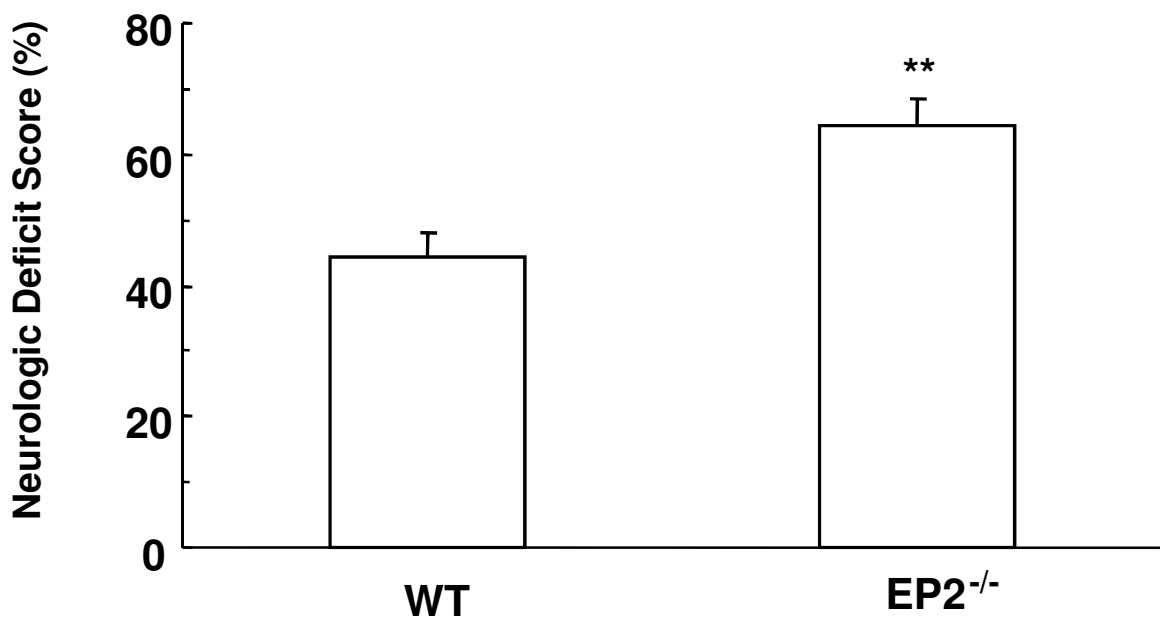

Supplement: MOESM3 [file 9676346]
